# Supplementary material for: Predicting the clinical trajectory in critically ill patients with sepsis: a cohort study
Source: Springer Nature journal article supplement (doi:10.1186/s13054-019-2687-z), 2019-12-01

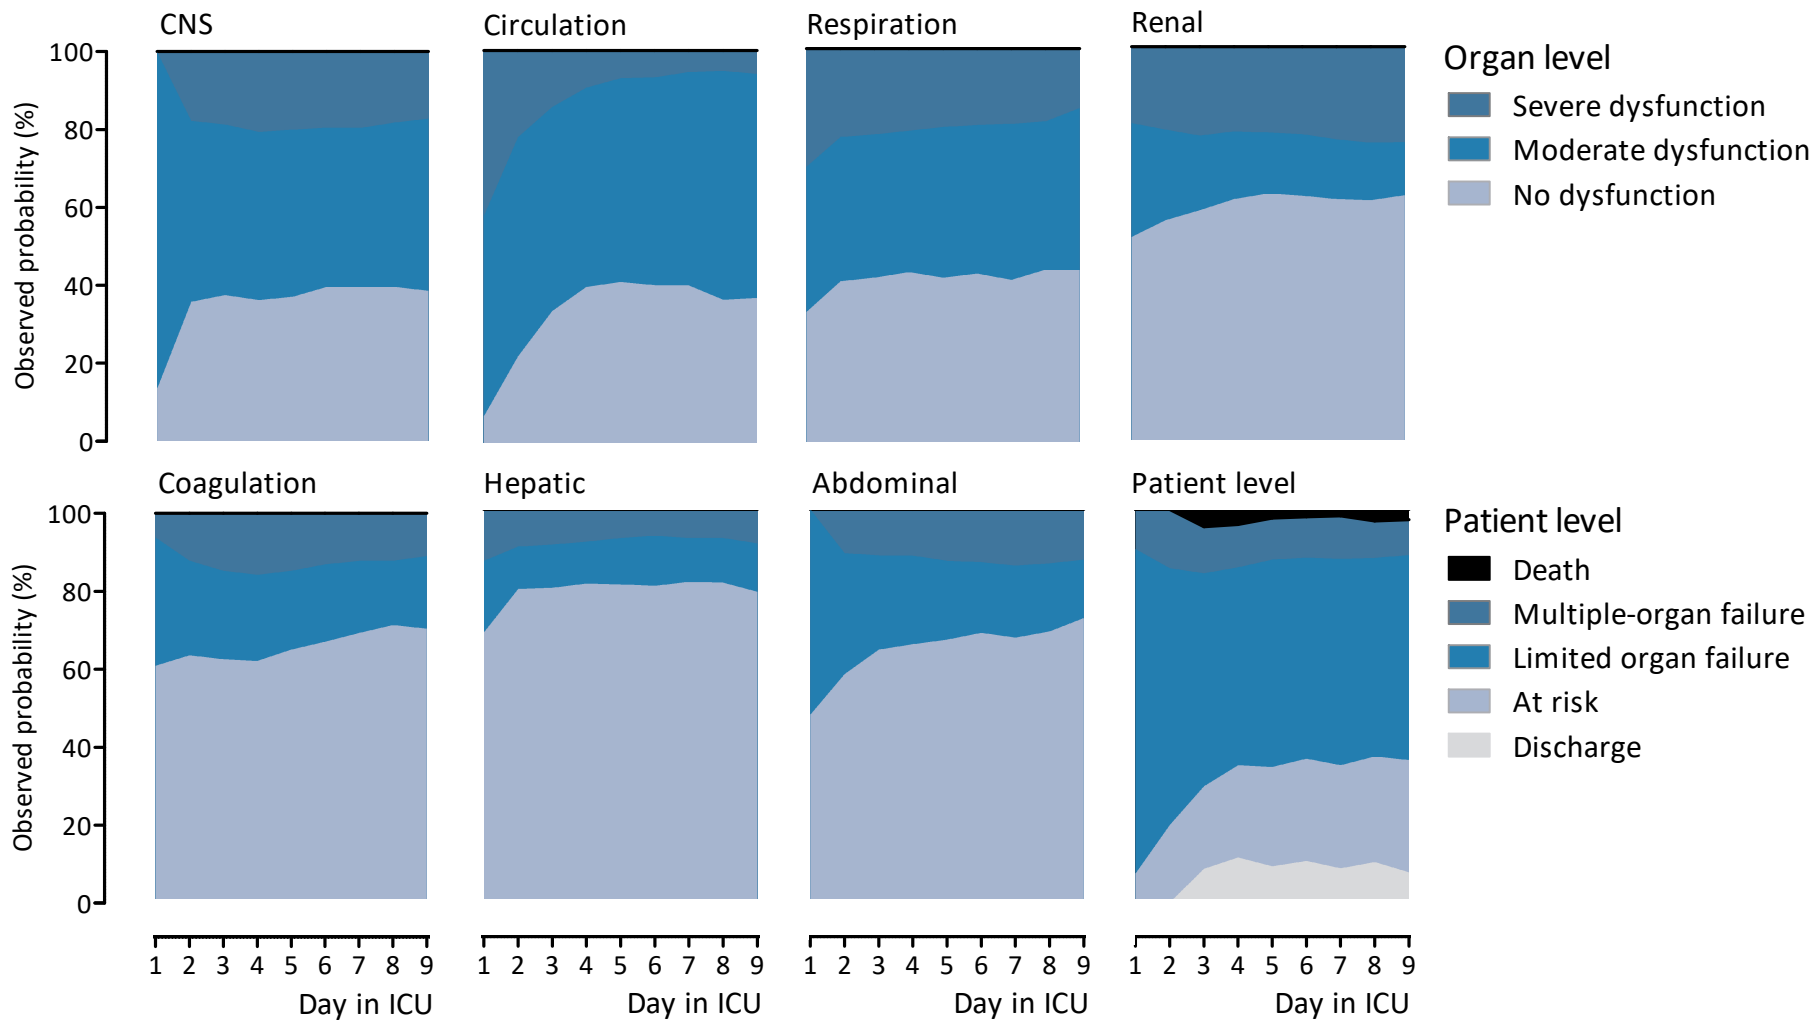

Supplement: MOESM2 [file 17661796]
