# Supplementary material for: Predicting the clinical trajectory in critically ill patients with sepsis: a cohort study
Source: Springer Nature journal article supplement (doi:10.1186/s13054-019-2687-z), 2019-12-01
Supplement: MOESM3 [file 17661796]

**Table S1: Transition hazard rates for selected variables**

| Variable                             | At risk to       |                       | Limited organ failure to |                  |                        |                  | Multiple-organ failure to |                  |
|--------------------------------------|------------------|-----------------------|--------------------------|------------------|------------------------|------------------|---------------------------|------------------|
|                                      | Discharge        | Limited organ failure | Discharge                | At risk          | Multiple-organ failure | Death            | Limited organ failure     | Death            |
| Age (<60 = ref)                      |                  |                       |                          |                  |                        |                  |                           |                  |
| 60-80                                | 0.93 (0.69-1.24) | 1.23 (0.9-1.69)       | 1.03 (0.87-1.22)         | 1.06 (0.86-1.31) | 1.00 (0.75-1.32)       | 1.32 (0.91-1.92) | 1.12 (0.85-1.49)          | 1.46 (0.92-2.32) |
| >80                                  | 1.06 (0.66-1.70) | 1.05 (0.6-1.83)       | 0.86 (0.61-1.21)         | 1.26 (0.89-1.77) | 0.30 (0.11-0.82)       | 2.45 (1.46-4.14) | 1.31 (0.64-2.69)          | 3.59 (1.30-9.95) |
| Immunodeficiency                     | 0.87 (0.61-1.24) | 1.19 (0.83-1.71)      | 1.06 (0.87-1.28)         | 0.78 (0.62-1.00) | 1.18 (0.87-1.59)       | 1.06 (0.72-1.55) | 0.84 (0.63-1.13)          | 1.17 (0.75-1.84) |
| Site of infection<br>(abdomen = ref) |                  |                       |                          |                  |                        |                  |                           |                  |
| Pulmonary                            | 0.84 (0.59-1.19) | 1.24 (0.85-1.80)      | 0.86 (0.68-1.09)         | 1.27 (0.99-1.62) | 0.70 (0.45-1.09)       | 0.66 (0.41-1.05) | 0.91 (0.6-1.40)           | 0.95 (0.50-1.79) |
| Urinary tract                        | 1.01 (0.56-1.84) | 1.19 (0.62-2.27)      | 1.25 (0.95-1.64)         | 0.63 (0.42-0.94) | 1.4 (0.90-2.16)        | 0.57 (0.30-1.07) | 0.69 (0.35-1.33)          | 0.97 (0.65-1.44) |
| C-reactive protein*                  | 0.80 (0.56-1.14) | 1.04 (0.73-1.48)      | 0.78 (0.66-0.94)         | 0.85 (0.69-1.06) | 1.31 (0.99-1.74)       | 0.87 (0.61-1.24) | 0.84 (0.65-1.08)          | 0.91 (0.61-1.38) |
| Bacteremia                           | 1.32 (0.87-2.01) | 0.75 (0.43-1.30)      | 1.02 (0.82-1.27)         | 0.70 (0.51-0.96) | 1.49 (1.09-2.04)       | 1.11 (0.72-1.72) | 0.80 (0.61-1.06)          | 0.95 (0.62-1.47) |

\*C-reactive protein levels were dichotomized using a cutoff of 100 mg/L. When levels decreased with more than 50 mmol/l compared to the previous measurement, the variable was set to 0. Only true bacteremias in post hoc analysis were included (contaminants were disregarded)
