# Supplementary material for: Predicting the clinical trajectory in critically ill patients with sepsis: a cohort study
Source: Springer Nature journal article supplement (doi:10.1186/s13054-019-2687-z), 2019-12-01
Supplement: MOESM4 [file 17661796]

**Table S2: Predisposition, infection, response, and organ failure (PIRO) characteristics of patients stratified by level of organ failure at admission in the validation cohort**

| Variable                               | At risk<br>N=14 | Limited organ<br>failure<br>N=484 | Multiple-<br>organ failure<br>N=55 | P-value |
|----------------------------------------|-----------------|-----------------------------------|------------------------------------|---------|
| <b>Predisposition</b>                  |                 |                                   |                                    |         |
| Age                                    | 60 (50-70)      | 64 (54-73)                        | 62 (54-69)                         | 0.23    |
| Male gender                            | 8 (57)          | 322 (67)                          | 39 (71)                            | 0.60    |
| Chronic comorbidities                  |                 |                                   |                                    |         |
| Diabetes mellitus                      | 1 (7)           | 83 (17)                           | 11 (20)                            | 0.52    |
| Cardiovascular disease <sup>a</sup>    | 3 (21)          | 152 (31)                          | 18 (33)                            | 0.71    |
| Immunodeficiency <sup>a</sup>          | 5 (36)          | 159 (33)                          | 18 (33)                            | 0.97    |
| Renal insufficiency <sup>a</sup>       | 3 (21)          | 65 (13)                           | 10 (18)                            | 0.46    |
| Respiratory insufficiency <sup>a</sup> | 2 (14)          | 114 (24)                          | 6 (11)                             | 0.08    |
| Admission type, medical                | 10 (71)         | 361 (75)                          | 40 (73)                            | 0.17    |
| <b>Insult</b>                          |                 |                                   |                                    |         |
| Source (hospital-acquired)             | 6 (43)          | 218 (45)                          | 26 (47)                            | 0.34    |
| Site / organ system                    |                 |                                   |                                    | 0.06    |
| Pulmonary                              | 6 (43)          | 263 (54)                          | 18 (33)                            |         |
| Abdomen                                | 2 (14)          | 46 (10)                           | 13 (24)                            |         |
| Urinary tract                          | 0 (0)           | 5 (1)                             | 0 (0)                              |         |
| Other or unknown                       | 6 (43)          | 170 (35)                          | 24 (44)                            |         |
| <b>Response</b>                        |                 |                                   |                                    |         |
| SIRS criteria <sup>a</sup>             |                 |                                   |                                    |         |
| Temperature                            | 6 (43)          | 273 (56)                          | 33 (60)                            | 0.51    |
| Leukocytes                             | 12 (86)         | 362 (75)                          | 44 (80)                            | 0.47    |
| Respiratory rate                       | 12 (86)         | 475 (99)                          | 55 (100)                           | 0.002   |
| Heart rate                             | 10 (71)         | 384 (79)                          | 52 (95)                            | 0.017   |
| C-reactive protein                     | 222 (60-354)    | 205 (113-306)                     | 244 (147-371)                      | 0.12    |
| Lactate                                | 2.3 (1.4-3.7)   | 2.4 (1.6-3.8)                     | 6.5 (3.5-8.0)                      | <0.001  |
| <b>Organ dysfunction</b>               |                 |                                   |                                    |         |
| SOFA score at admission                | 5 (3-6)         | 8 (6-10)                          | 12 (10-13)                         | <0.001  |
| APACHE IV score                        | 79 (56-89)      | 87 (71-108)                       | 108 (91-127)                       | <0.001  |
| <b>Outcome</b>                         |                 |                                   |                                    |         |
| ICU case fatality                      | 0 (0)           | 107 (22)                          | 22 (40)                            | 0.001   |
| ICU length of stay, day                | 3 (2-5)         | 8 (4-15)                          | 15 (7-24)                          | <0.001  |

Data are numbers (percentage) or median (inter-quartile range). Abbreviations: APACHE Acute Physiology and Chronic Health Evaluation; ICU Intensive Care Unit; SIRS Systemic Inflammatory Response Syndrome. <sup>a</sup> Definitions of comorbidities and the systemic inflammatory response syndrome criteria are mentioned in table 3 of the article.
